# Supplementary material
Source: publisher figshare collection journal article supplement (https://sage.figshare.com/ndownloader/files/13438556)
Supplement: Supplementary file 1 [file 13438556]

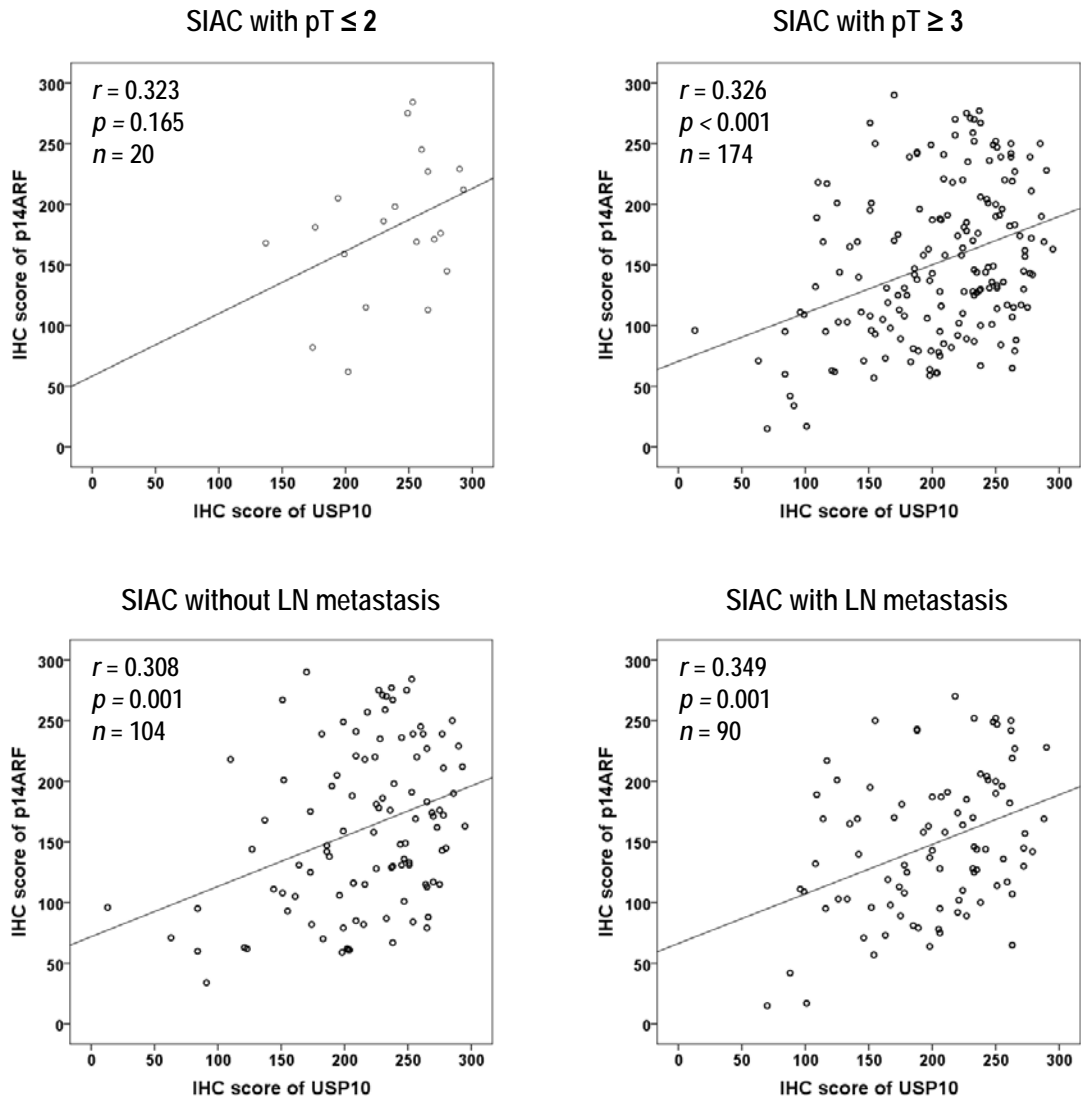

**Supplementary Figure S1.** Association between USP 10 and p14ARF expression in small intestinal adenocarcinoma. USP10 expression was positively correlated with p14ARF expression in tumors at an advanced stage (*Spearman's rho*=0.326,  $p<0.001$ ) and with lymph node metastasis (*Spearman's rho*=0.349,  $p=0.001$ ). SIAC, small intestinal adenocarcinoma.

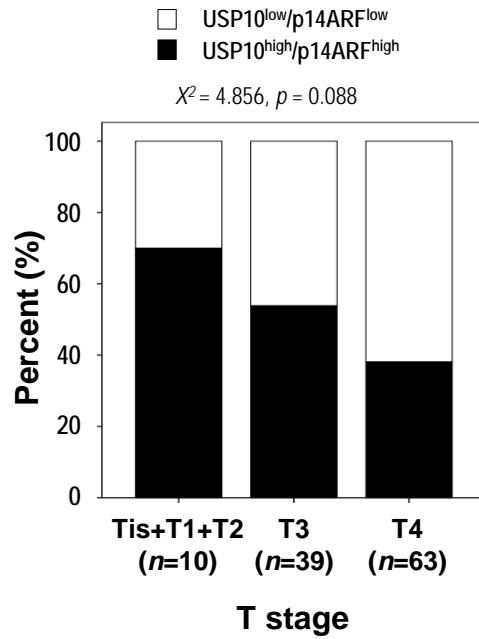

**Supplementary Figure S2.** The combined expression of USP10 and p14AR in small intestinal adenocarcinoma tissue. The combination of USP10<sup>high</sup>/p14AR<sup>high</sup> showed a tendency of negative correlation with advanced T stage ( $p=0.088$ ).
